# Supplementary material
Source: publisher figshare collection journal article supplement (https://sage.figshare.com/ndownloader/files/14464454)
Supplement: Supplementary file 1 [file 14464454]

## **Supplemental information**

### **Development of a novel cell-based assay system for high throughput screening of compounds acting on background two-pore domain K<sup>+</sup> channels**

**Keisuke Kawasaki<sup>1</sup>, Yoshiaki Suzuki<sup>1</sup>, Hisao Yamamura<sup>1</sup>, Yuji Imaizumi<sup>1,2\*</sup>**

<sup>1</sup>Department of Molecular & Cellular Pharmacology, Graduate School of Pharmaceutical Sciences, Nagoya City University, Nagoya, Japan

<sup>2</sup>Department of Research and Development, ChanneloSearch Technology, Co., Ltd.,  
Nagoya, Japan

\*To whom correspondence should be addressed: Yuji Imaizumi, Ph.D.,  
Department of Molecular & Cellular Pharmacology, Graduate School of  
Pharmaceutical Sciences, Nagoya City University, 3-1 Tanabedori, Mizuhoku,  
Nagoya 467-8603, Japan  
Tel: +81-52-853-8304  
FAX: +81-52-836-3470  
E-mail: yimaizum@phar.nagoya-cu.ac.jp

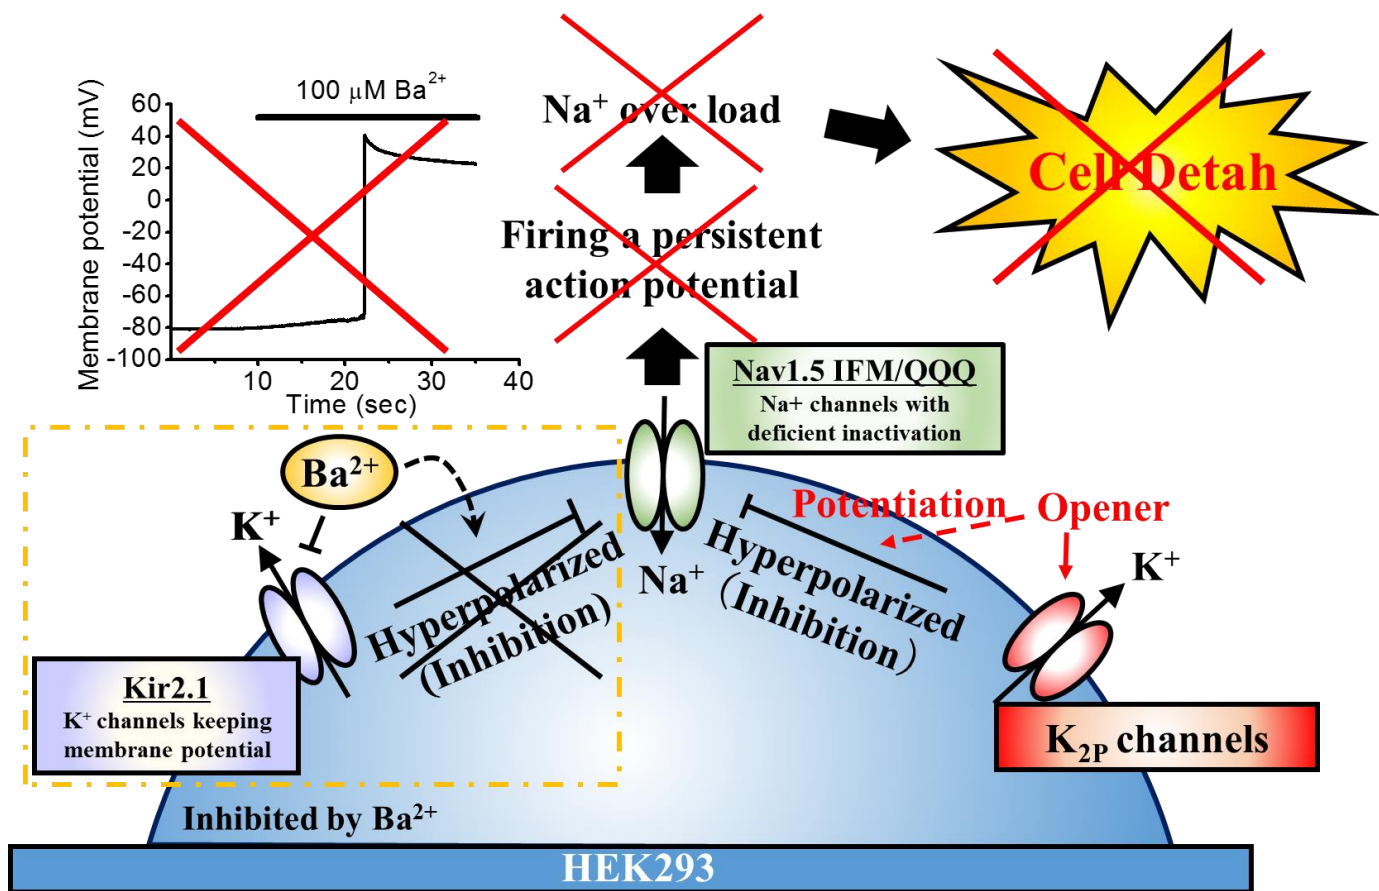

**Supplemental Figure 1.** Schematic diagram for  $K_{2P}$  channel openers. Schematic diagram showing the concept of our new cell-based assay for  $K_{2P}$  channel openers. If  $K_{2P}$  channels are activated by selective channel openers, the RMP remains relatively hyperpolarized even in the presence of  $Ba^{2+}$  and  $Ba^{2+}$ -induced cell death is inhibited.

Supplemental Table 1. Ba<sup>2+</sup> sensitivity of Kir2.1 and K<sub>2P</sub> channels.

| Channels | Gene  | Ba <sup>2+</sup> IC <sub>50</sub> | Reference                              |
|----------|-------|-----------------------------------|----------------------------------------|
| Kir2.1   | KCNJ2 | 16.2±3.6 μM                       | Schram et al.,2003 <sup>19</sup>       |
| TREK-1   | KCNK2 | 560±3 μM                          | Xiao-Yun Ma et al., 2011 <sup>29</sup> |
| TRAAK    | KCNK4 | insensitive                       | Lesage et al., 2000 <sup>28</sup>      |
| TASK-1   | KCNK3 | >400 μM                           | Larkman et al.,2005 <sup>20</sup>      |
| TASK-3   | KCNK9 | >300 μM                           | Kim et al., 2000 <sup>21</sup>         |

**Supplemental Table 1. Ba<sup>2+</sup> sensitivity of Kir2.1 and K<sub>2P</sub> channels**

Data depicting sensitivity to block of K<sub>2P</sub> channels to Ba<sup>2+</sup> are listed and compared with results for Kir2.1. It is well known that Kir2.1 is very sensitive to Ba<sup>2+</sup> in comparison with K<sub>2P</sub> channels. The K<sub>2P</sub> channels those are listed are either almost insensitive to or only partially blocked by much higher Ba<sup>2+</sup> concentration.
